# Supplementary material
Source: PubMed Central journal article supplement (PMC5127223)
Supplement: DC160857SupplementaryData.pdf [file DC160857SupplementaryData.pdf]

SUPPLEMENTARY DATA

**Supplementary Table 1.** Comparison of outcomes using one-year, four-year, and seven-year lag between BP and outcome ascertainment in fully adjusted models.

| <b>Hazard ratio*</b><br>(95% CI)  | <b>One-year</b> lag between<br>BP ascertainment and<br>outcomes | <b>Four-year</b> lag between<br>BP ascertainment and<br>outcomes | <b>Seven-year</b> lag<br>between BP<br>ascertainment and<br>outcomes |
|-----------------------------------|-----------------------------------------------------------------|------------------------------------------------------------------|----------------------------------------------------------------------|
| <b>Macroalbuminuria</b>           |                                                                 |                                                                  |                                                                      |
| <b>Systolic BP</b>                |                                                                 |                                                                  |                                                                      |
| Every 10 mm Hg<br>increase in SBP | 1.44 (1.28-1.62)                                                | 1.06 (0.92-1.22)                                                 | 1.11 (0.95-1.30)                                                     |
| 130-<140 mm Hg                    | Reference                                                       | 1.0 (Ref)                                                        | 1.0 (Ref)                                                            |
| 120-<130 mm Hg                    | 0.84 (0.53-1.36)                                                | 0.70 (0.44-1.12)                                                 | 1.19 (0.61-2.32)                                                     |
| <120 mm Hg                        | 0.59 (0.37-0.95)                                                | 0.63 (0.40-0.99)                                                 | 1.12 (0.59-2.12)                                                     |
| <b>Diastolic BP</b>               |                                                                 |                                                                  |                                                                      |
| Every 10 mm Hg<br>increase in SBP | 1.32 (1.10-1.59)                                                | 1.16 (0.96-1.40)                                                 | 1.15 (0.93-1.44)                                                     |
| 80-<90 mm Hg                      | Reference                                                       | Reference                                                        | Reference                                                            |
| 70-<80 mm Hg                      | 0.71 (0.48-1.04)                                                | 0.96 (0.66-1.39)                                                 | 0.76 (0.50-1.17)                                                     |
| <70 mm Hg                         | 0.73 (0.44-1.18)                                                | 0.65 (0.39-1.10)                                                 | 0.79 (0.48-1.32)                                                     |
| <b>CKD Stage III</b>              |                                                                 |                                                                  |                                                                      |
| <b>Systolic BP</b>                |                                                                 |                                                                  |                                                                      |
| Every 10 mm Hg<br>increase in SBP | 1.34 (1.16-1.54)                                                | 1.29 (1.12-1.50)                                                 | 1.26 (1.07-1.47)                                                     |
| 130-<140 mm Hg                    | 1.0 (Ref)                                                       | 1.0 (Ref)                                                        | 1.0 (Ref)                                                            |
| 120-<130 mm Hg                    | 1.46 (0.75-2.83)                                                | 0.82 (0.42-1.61)                                                 | 0.86 (0.45-1.62)                                                     |
| <120 mm Hg                        | 0.32 (0.14-0.75)                                                | 0.62 (0.32-1.21)                                                 | 0.50 (0.27-0.96)                                                     |
| <b>Diastolic BP</b>               |                                                                 |                                                                  |                                                                      |
| Every 10 mm Hg<br>increase in DBP | 1.41 (1.09-1.82)                                                | 1.56 (1.21-2.01)                                                 | 1.36 (1.05-1.76)                                                     |
| 80-<90 mm Hg                      | 1.0 (Ref)                                                       | 1.0 (Ref)                                                        | 1.0 (Ref)                                                            |
| 70-<80 mm Hg                      | 1.11 (0.61-2.01)                                                | 0.63 (0.38-1.07)                                                 | 0.54 (0.32-0.92)                                                     |
| <70 mm Hg                         | 0.47 (0.21-1.05)                                                | 0.42 (0.20-0.86)                                                 | 0.49 (0.26-0.94)                                                     |

\* Adjusted for age, sex, race, education, family history of hypertension, trial arm, and time-dependent lagged covariates including hemoglobin A1C, body mass index, smoking status, use of any anti-hypertensive medication, use of RAAS blockade (ACE inhibitor or ARB), albuminuria, and eGFR, and stratified by primary or secondary prevention cohort.
